# Supplementary material
Source: publisher figshare collection journal article supplement (https://rs.figshare.com/ndownloader/files/25292169)
Supplement: Supplementary file 1 [file 25292169]

Electronic Supplementary Material (ESM) for

**RSPB20201182 “Famine related mortality in early life and accelerated life histories in nineteenth-century Belgium”**

Katharina E. Pink\*, Robert J. Quinlan, Saskia Hin

Proceedings of the Royal Society B

<http://dx.doi.org/10.1098/rspb.2020.1182>

\*corresponding author: [a0522692@unet.univie.ac.at](mailto:a0522692@unet.univie.ac.at)

**A1 – Figure 1.** Number of marriages per 1 000 inhabitants in Belgium in 1841-1850, 1857, 1866, 1881-1890 and 1891-1900

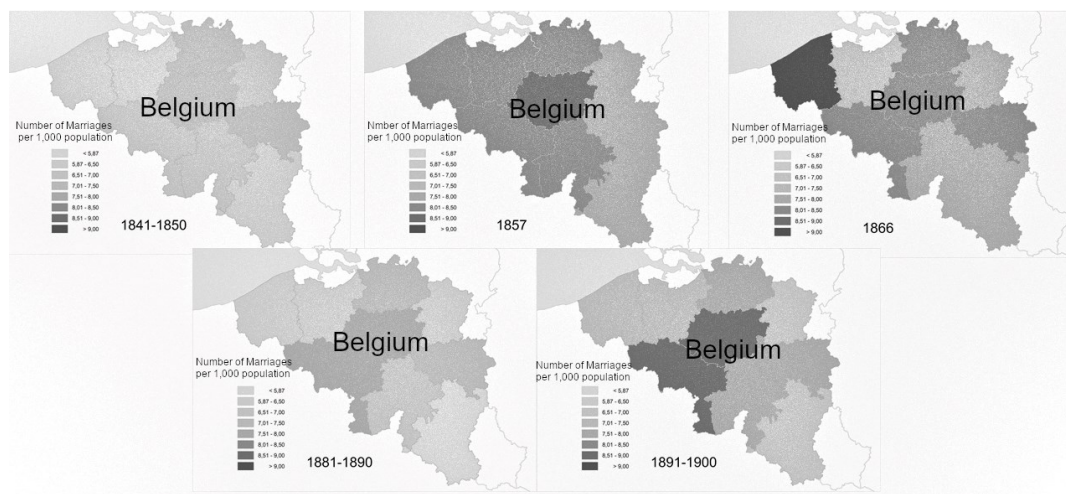

**A2 – Figure 2.** Number of deaths per 1 000 inhabitants per province, Belgium in 1841-1850.

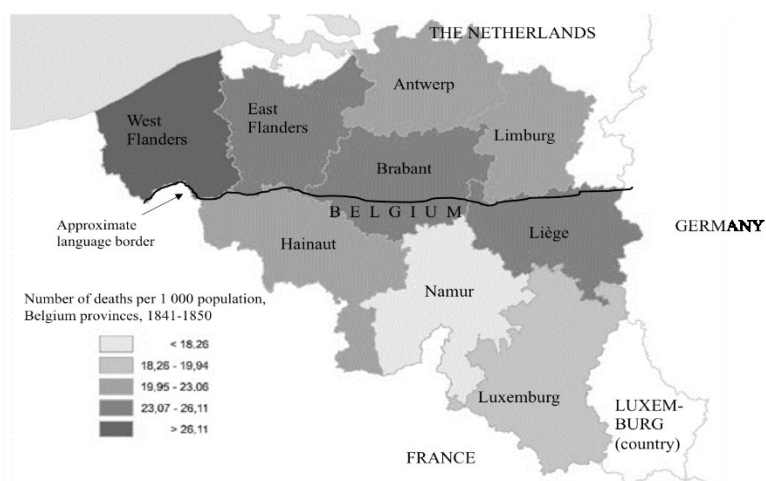

### A3 – Brides model without theta-parameter

Cox regression -- Breslow method for ties

|                   |             |                 |        |
|-------------------|-------------|-----------------|--------|
| No. of subjects = | 11,892      | Number of obs = | 11,892 |
| No. of failures = | 11,892      |                 |        |
| Time at risk =    | 309128.2244 |                 |        |
|                   |             | LR chi2(12) =   | 724.39 |
| Log likelihood =  | -99344.858  | Prob > chi2 =   | 0.0000 |

| _t                         | Haz. Ratio | Std. Err. | z     | P> z  | [95% Conf. Interval] |          |
|----------------------------|------------|-----------|-------|-------|----------------------|----------|
| CDR_total_cat              |            |           |       |       |                      |          |
| 2                          | 1.093743   | .0310585  | 3.16  | 0.002 | 1.034533             | 1.156343 |
| 3                          | 1.669239   | .0614095  | 13.93 | 0.000 | 1.553116             | 1.794045 |
| HISCLASS4_BrideFa          |            |           |       |       |                      |          |
| 1                          | 1.178489   | .1122893  | 1.72  | 0.085 | .9777348             | 1.420464 |
| 2                          | .9283978   | .0893371  | -0.77 | 0.440 | .7688212             | 1.121096 |
| 3                          | 1.018189   | .0977299  | 0.19  | 0.851 | .8435808             | 1.228939 |
| signed_bride               | .8582335   | .016934   | -7.75 | 0.000 | .8256771             | .8920737 |
| PG_average                 | 1.024906   | .0054236  | 4.65  | 0.000 | 1.014331             | 1.035592 |
| migration_bride_urbanrural |            |           |       |       |                      |          |
| 1                          | .8705966   | .0212472  | -5.68 | 0.000 | .8299331             | .9132523 |
| 2                          | .8932608   | .0279921  | -3.60 | 0.000 | .8400482             | .9498442 |
| 3                          | .4900226   | .0383579  | -9.11 | 0.000 | .4203257             | .5712763 |
| 4                          | .7776841   | .0535147  | -3.65 | 0.000 | .6795628             | .889973  |
| byear_bride                | 1.049679   | .0067511  | 7.54  | 0.000 | 1.036531             | 1.062995 |

### A4 – Grooms model without theta-parameter

Cox regression -- Breslow method for ties

|                   |             |                 |        |
|-------------------|-------------|-----------------|--------|
| No. of subjects = | 14,140      | Number of obs = | 14,140 |
| No. of failures = | 14,140      |                 |        |
| Time at risk =    | 417357.1307 |                 |        |
|                   |             | LR chi2(12) =   | 551.73 |
| Log likelihood =  | -120725.61  | Prob > chi2 =   | 0.0000 |

| _t                         | Haz. Ratio | Std. Err. | z     | P> z  | [95% Conf. Interval] |          |
|----------------------------|------------|-----------|-------|-------|----------------------|----------|
| CDR_total_cat              |            |           |       |       |                      |          |
| 2                          | 1.129672   | .0287181  | 4.80  | 0.000 | 1.074765             | 1.187384 |
| 3                          | 1.32952    | .0456321  | 8.30  | 0.000 | 1.243025             | 1.422034 |
| HISCLASS4_groom            |            |           |       |       |                      |          |
| 1                          | 1.261144   | .0746799  | 3.92  | 0.000 | 1.122948             | 1.416346 |
| 2                          | .9812339   | .0594698  | -0.31 | 0.755 | .8713318             | 1.104998 |
| 3                          | 1.252248   | .0739064  | 3.81  | 0.000 | 1.115459             | 1.405813 |
| signed_groom               | .8729675   | .0170802  | -6.94 | 0.000 | .8401247             | .9070942 |
| PG_average                 | 1.040524   | .0050563  | 8.17  | 0.000 | 1.030661             | 1.050482 |
| migration_groom_urbanrural |            |           |       |       |                      |          |
| 1                          | .8659548   | .0167506  | -7.44 | 0.000 | .8337389             | .8994156 |
| 2                          | .8641417   | .0241115  | -5.23 | 0.000 | .8181464             | .9127227 |
| 3                          | .7240466   | .0464527  | -5.03 | 0.000 | .6384927             | .8210642 |
| 4                          | .7176917   | .0389384  | -6.11 | 0.000 | .6452915             | .798215  |
| birthyear_groom            | 1.008697   | .0059779  | 1.46  | 0.144 | .997048              | 1.020481 |

## A5 – Brides model without socioeconomic control variables

Cox regression -- Breslow method for ties

|                   |             |                 |        |
|-------------------|-------------|-----------------|--------|
| No. of subjects = | 11,892      | Number of obs = | 11,892 |
| No. of failures = | 11,892      |                 |        |
| Time at risk =    | 309128.2244 |                 |        |
|                   |             | LR chi2(8) =    | 494.28 |
| Log likelihood =  | -99459.913  | Prob > chi2 =   | 0.0000 |

|                            | _t | Haz. Ratio | Std. Err. | z     | P> z  | [95% Conf. Interval] |          |
|----------------------------|----|------------|-----------|-------|-------|----------------------|----------|
| CDR_total_cat              | 2  | 1.091419   | .0309926  | 3.08  | 0.002 | 1.032334             | 1.153886 |
|                            | 3  | 1.710331   | .0616042  | 14.90 | 0.000 | 1.593753             | 1.835437 |
| PG_average                 |    | 1.029872   | .005396   | 5.62  | 0.000 | 1.01935              | 1.040502 |
| migration_bride_urbanrural | 1  | .9518836   | .0223295  | -2.10 | 0.036 | .9091094             | .9966703 |
|                            | 2  | .9325196   | .0272566  | -2.39 | 0.017 | .8805991             | .9875015 |
|                            | 3  | .5137468   | .0402227  | -8.51 | 0.000 | .4406625             | .5989522 |
|                            | 4  | .7679185   | .0527654  | -3.84 | 0.000 | .6711618             | .8786239 |
| byear_bride                |    | 1.045313   | .0067097  | 6.90  | 0.000 | 1.032245             | 1.058547 |

## A6 – Grooms without socioeconomic control variables

Cox regression -- Breslow method for ties

|                   |             |                 |        |
|-------------------|-------------|-----------------|--------|
| No. of subjects = | 14,140      | Number of obs = | 14,140 |
| No. of failures = | 14,140      |                 |        |
| Time at risk =    | 417357.1307 |                 |        |
|                   |             | LR chi2(8) =    | 318.95 |
| Log likelihood =  | -120842     | Prob > chi2 =   | 0.0000 |

|                            | _t | Haz. Ratio | Std. Err. | z     | P> z  | [95% Conf. Interval] |          |
|----------------------------|----|------------|-----------|-------|-------|----------------------|----------|
| CDR_total_cat              | 2  | 1.142792   | .0290278  | 5.25  | 0.000 | 1.087291             | 1.201125 |
|                            | 3  | 1.396945   | .0470652  | 9.92  | 0.000 | 1.307679             | 1.492305 |
| PG_average                 |    | 1.047197   | .0050607  | 9.54  | 0.000 | 1.037325             | 1.057162 |
| migration_groom_urbanrural | 1  | .8929407   | .0171008  | -5.91 | 0.000 | .860045              | .9270947 |
|                            | 2  | .9212438   | .0244813  | -3.09 | 0.002 | .8744896             | .9704978 |
|                            | 3  | .7297351   | .0468134  | -4.91 | 0.000 | .6435164             | .8275054 |
|                            | 4  | .7231478   | .0391925  | -5.98 | 0.000 | .6502712             | .8041919 |
| birthyear_groom            |    | 1.008585   | .0059803  | 1.44  | 0.149 | .9969311             | 1.020374 |

**A7 – Table 1.:** Brides' mean age at first marriage, total number of individuals in each CDR category and total number of individuals in each HISCLASS category sorted by province.

| Province         | Mean Age at Marriage<br>(s.d.) | Number of Individuals<br>(%) | Total Number of Individuals per CDR |                  |                  | Total Number of Individuals per combined HISCLASS Bride and Father Bride |                  |                  |               |
|------------------|--------------------------------|------------------------------|-------------------------------------|------------------|------------------|--------------------------------------------------------------------------|------------------|------------------|---------------|
|                  |                                |                              | Low (%)                             | Middle (%)       | High (%)         | Low (%)                                                                  | Farmer (%)       | Middle (%)       | High (%)      |
| Antwerp          | 25.74 (± 4.58)                 | 352<br>(2.96)                | 63<br>(17.90)                       | 257<br>(73.01)   | 32<br>(9.09)     | 201<br>(57.10)                                                           | 42<br>(11.93)    | 108<br>(30.68)   | 1<br>(0.28)   |
| Brabant          | 25.92 (± 4.61)                 | 10,503<br>(88.32)            | 1,199<br>(11.42)                    | 7,311<br>(69.61) | 1,993<br>(18.98) | 5,022<br>(47.81)                                                         | 3,583<br>(34.11) | 1,804<br>(17.18) | 94<br>(0.89)  |
| Hainaut          | 26.76 (± 5.24)                 | 223<br>(1.88)                | 35<br>(15.70)                       | 169<br>(75.78)   | 19<br>(8.52)     | 108<br>(48.43)                                                           | 28<br>(12.56)    | 79<br>(35.43)    | 8<br>(3.59)   |
| Liège            | 27.05 (± 4.81)                 | 225<br>(1.89)                | 109<br>(48.44)                      | 107<br>(47.56)   | 9<br>(4.00)      | 115<br>(51.11)                                                           | 37<br>(16.44)    | 69<br>(30.67)    | 4<br>(1.78)   |
| Limburg          | 27.07 (± 4.49)                 | 133<br>(1.12)                | 11<br>(8.27)                        | 122<br>(91.73)   | -                | 95<br>(71.43)                                                            | 6<br>(4.51)      | 29<br>(21.80)    | 3<br>(2.26)   |
| Luxemburg        | 31.80 (± 4.53)                 | 25<br>(0.21)                 | 8<br>(32.00)                        | 17<br>(68.00)    | -                | 11<br>(44.00)                                                            | -                | 14<br>(56.00)    | -             |
| Namur            | 27.66 (± 5.00)                 | 69<br>(0.58)                 | 33<br>(47.83)                       | 36<br>(52.17)    | -                | 34<br>(49.28)                                                            | 1<br>(1.45)      | 34<br>(49.28)    | -             |
| East Flanders    | 26.20 (± 4.91)                 | 276<br>(2.32)                | 7<br>(2.54)                         | 220<br>(79.71)   | 49<br>(17.75)    | 177<br>(64.13)                                                           | 9<br>(3.26)      | 88<br>(31.88)    | 2<br>(0.72)   |
| West Flanders    | 26.45 (± 5.12)                 | 86<br>(0.72)                 | -                                   | 34<br>(39.53)    | 52<br>(60.47)    | 49<br>(56.98)                                                            | 10<br>(11.63)    | 24<br>(27.91)    | 3<br>(3.49)   |
| <b>Total (%)</b> |                                | 11,892                       | 1,465<br>(12.32)                    | 8,273<br>(69.57) | 2,154<br>(18.11) | 5,812<br>(48.87)                                                         | 3,716<br>(31.25) | 2,249<br>(18.91) | 115<br>(0.97) |

**A8 – Table 2.:** Grooms' mean age at first marriage, total number of individuals in each CDR category and total number of individuals in each HISCLASS category sorted by province.

| Province         | Mean Age at Marriage<br>(s.d.) | Number of Individuals<br>(%) | Total Number of Individuals per CDR |                   |                  | Total Number of Individuals per HISCLASS Groom |                  |                  |               |
|------------------|--------------------------------|------------------------------|-------------------------------------|-------------------|------------------|------------------------------------------------|------------------|------------------|---------------|
|                  |                                |                              | Low (%)                             | Middle (%)        | High (%)         | Low (%)                                        | Farmer (%)       | Middle (%)       | High (%)      |
| Antwerp          | 29.60 (± 6.26)                 | 515<br>(3.64)                | 95<br>(18.45)                       | 371<br>(72.04)    | 49<br>(9.51)     | 223<br>(43.30)                                 | 77<br>(14.95)    | 189<br>(36.70)   | 26<br>(5.05)  |
| Brabant          | 29.29 (± 6.15)                 | 11,767<br>(83.22)            | 1,418<br>(12.05)                    | 8,413<br>(71.50)  | 1,936<br>(16.45) | 4,620<br>(39.26)                               | 3,328<br>(28.28) | 3,639<br>(30.93) | 180<br>(1.53) |
| Hainaut          | 30.75 (± 6.53)                 | 291<br>(2.06)                | 55<br>(18.90)                       | 210<br>(72.16)    | 26<br>(8.93)     | 117<br>(40.21)                                 | 25<br>(8.59)     | 125<br>(42.96)   | 24<br>(8.25)  |
| Liège            | 31.20 (± 6.39)                 | 326<br>(2.31)                | 131<br>(40.18)                      | 187<br>(57.36)    | 8<br>(2.45)      | 142<br>(43.56)                                 | 42<br>(12.88)    | 122<br>(37.42)   | 20<br>(6.13)  |
| Limburg          | 30.73 (± 6.05)                 | 205<br>(1.45)                | 28<br>(13.66)                       | 177<br>(86.34)    | -                | 112<br>(54.63)                                 | 21<br>(10.24)    | 61<br>(29.76)    | 11<br>(5.37)  |
| Luxemburg        | 33.23 (± 7.51)                 | 43<br>(0.30)                 | 23<br>(53.49)                       | 20<br>(46.51)     | -                | 15<br>(34.88)                                  | 2<br>(4.65)      | 24<br>(55.81)    | 2<br>(4.65)   |
| Namur            | 31.89 (± 6.37)                 | 116<br>(0.82)                | 64<br>(55.17)                       | 52<br>(44.83)     | -                | 44<br>(37.93)                                  | -                | 64<br>(55.17)    | 8<br>(6.90)   |
| East Flanders    | 30.76 (± 6.63)                 | 674<br>(4.77)                | 30<br>(4.45)                        | 540<br>(80.12)    | 104<br>(15.43)   | 285<br>(42.28)                                 | 102<br>(15.13)   | 263<br>(39.02)   | 24<br>(3.56)  |
| West Flanders    | 30.52 (± 6.72)                 | 203<br>(1.44)                | 1<br>(0.49)                         | 97<br>(47.78)     | 105<br>(51.72)   | 69<br>(33.99)                                  | 12<br>(5.91)     | 109<br>(53.69)   | 13<br>(6.40)  |
| <b>Total (%)</b> |                                | 14,140                       | 1,845<br>(13.05)                    | 10,067<br>(71.20) | 2,228<br>(15.76) | 5,627<br>(39.79)                               | 3,609<br>(25.52) | 4,596<br>(32.50) | 308<br>(2.18) |

**A9 – Table 3.:** Effects of municipality level mortality on women's age at first marriage.

| Variable                                  | HR      | St.Err. | z     | p-value | 95% CL |       |
|-------------------------------------------|---------|---------|-------|---------|--------|-------|
| <b>Total CDR</b>                          |         |         |       |         |        |       |
| (Ref.Cat.: Low<br><20/1000)               |         |         |       |         |        |       |
| Middle<br>(20 – 32/1000)                  | 1.079   | .031    | 2.65  | 0.008   | 1.020  | 1.142 |
| High (>32/1000)                           | 1.661   | .063    | 13.37 | < 0.001 | 1.542  | 1.789 |
| <b>HISCLASS</b>                           |         |         |       |         |        |       |
| <b>Combi</b>                              |         |         |       |         |        |       |
| <b>bride&amp;father</b>                   |         |         |       |         |        |       |
| (Ref.Cat.: High)                          |         |         |       |         |        |       |
| Low                                       | 1.169   | .111    | 1.64  | 0.102   | .970   | 1.410 |
| Farmer                                    | .918    | .089    | -0.89 | 0.357   | .760   | 1.109 |
| Middle                                    | 1.016   | .098    | 0.17  | 0.865   | .842   | 1.227 |
| <b>Bride literate</b>                     | .861    | .017    | -7.57 | < 0.001 | .828   | .895  |
| <b>Total</b>                              |         |         |       |         |        |       |
| <b>population</b>                         | 1.024   | .006    | 4.46  | < 0.001 | 1.014  | 1.035 |
| <b>growth</b>                             |         |         |       |         |        |       |
| <b>Bride migration</b>                    |         |         |       |         |        |       |
| <b>status</b> (Ref.Cat.:<br>Not migrated) |         |         |       |         |        |       |
| Rural-rural<br>migration                  | .886    | .022    | -4.79 | < 0.001 | .844   | .931  |
| Rural-urban<br>migration                  | .971    | .035    | -0.80 | 0.424   | .904   | 1.043 |
| Urban-rural<br>migration                  | .486    | .0380   | -9.22 | < 0.001 | .417   | .566  |
| Urban-urban<br>migration                  | .770    | .053    | -3.79 | < 0.001 | .673   | .882  |
| <b>Birth year bride</b>                   | 1.052   | .007    | 7.83  | < 0.001 | 1.039  | 1.065 |
|                                           |         |         |       |         |        |       |
| <b>N</b>                                  | 11,892  |         |       |         |        |       |
| <b>Theta</b>                              | .023    | .017    |       |         |        |       |
| <b>Likelihood</b>                         | 24.61   |         |       |         |        |       |
| <b>ratio test</b>                         |         |         |       |         |        |       |
| <b>p-value</b>                            | < 0.001 |         |       |         |        |       |
| <b>likelihood</b>                         |         |         |       |         |        |       |

**A10 – Table 4.:** Effects of municipality level mortality on men's age at first marriage.

| Variable                                                      | HR      | St.Err. | z     | p-value | 95% CL |       |
|---------------------------------------------------------------|---------|---------|-------|---------|--------|-------|
| <b>Total CDR</b>                                              |         |         |       |         |        |       |
| (Ref.Cat.: Low<br><20/1000)                                   |         |         |       |         |        |       |
| Middle<br>(20 – 32/1000)                                      | 1.114   | .029    | 4.19  | < 0.001 | 1.059  | 1.172 |
| High (>32/1000)                                               | 1.327   | .047    | 8.01  | < 0.001 | 1.238  | 1.422 |
| <b>HISCLASS</b>                                               |         |         |       |         |        |       |
| <b>groom</b> (Ref.Cat.:<br>High)                              |         |         |       |         |        |       |
| Low                                                           | 1.236   | .073    | 3.58  | < 0.001 | 1.101  | 1.389 |
| Farmer                                                        | .953    | .058    | -0.79 | 0.431   | .846   | 1.074 |
| Middle                                                        | 1.228   | .073    | 3.48  | < 0.001 | 1.094  | 1.380 |
| <b>Groom literate</b>                                         | .875    | .017    | -6.79 | < 0.001 | .842   | .910  |
| <b>Total population<br/>growth</b>                            | 1.039   | .005    | 7.67  | < 0.001 | 1.029  | 1.049 |
| <b>Groom migration<br/>status</b> (Ref.Cat.:<br>Not migrated) |         |         |       |         |        |       |
| Rural-rural<br>migration                                      | .894    | .018    | -5.56 | < 0.001 | .860   | .930  |
| Rural-urban<br>migration                                      | .947    | .029    | -1.75 | 0.081   | .892   | 1.006 |
| Urban-rural<br>migration                                      | .718    | .046    | -5.16 | < 0.001 | .633   | .814  |
| Urban-urban<br>migration                                      | .712    | .039    | -6.25 | < 0.001 | .640   | .792  |
| <b>Birth year groom</b>                                       | 1.010   | .006    | 1.73  | .083    | .999   | 1.022 |
| <b>N</b>                                                      | 14,140  |         |       |         |        |       |
| <b>Theta</b>                                                  | .009    | .006    |       |         |        |       |
| <b>Likelihood ratio<br/>test</b>                              | 43.45   |         |       |         |        |       |
| <b>p-value<br/>likelihood</b>                                 | < 0.001 |         |       |         |        |       |

**A11 – Table 5.:** Aggregated regional cohort size of men and women aged 21-25 in census years 1846, 1856, 1866 and 1880.

| Birth cohort | Census year | Total N | N Male  | N Female | Sex ratio<br>(N Male/N Female) | N per<br>1,000 population |
|--------------|-------------|---------|---------|----------|--------------------------------|---------------------------|
| 1821-1825    | 1846        | 387,948 | 195,975 | 191,973  | 1.021                          | 89.45                     |
| 1831-1835    | 1856        | 386,426 | 198,695 | 187,731  | 1.058                          | 85.32                     |
| 1841-1845    | 1866        | 410,507 | 206,506 | 204,001  | 1.012                          | 85.03                     |
| 1855-1859    | 1880        | 445,621 | 224,158 | 221,463  | 1.012                          | 80.73                     |

Source: Annuaire Statistique 1890, p. 54-57. See

[http://extranet.arch.be/BIB\\_A4P131/BIB\\_A4P131\\_1890.pdf#search=%22age%22](http://extranet.arch.be/BIB_A4P131/BIB_A4P131_1890.pdf#search=%22age%22)

Varying cohort size may change competition for mates: when the size of a cohort entering the marriage market is much smaller than that of a preceding cohort, this may decrease competition for spouses and hence lead to lower age at first marriage (Bronson & Mazzocco, 2018) – and vice versa. The specific history of Belgium, which became independent only in 1830, makes that data available were not sufficiently fine-grained or systematic over time to include cohorts before 1841 or after 1846 into our model analyses as a control.

However, country-level information on cohort size is available for census years. We looked into the sizes of cohorts aged 21-25 during the census years 1846, 1856, 1866 and 1880 to verify whether, around the time they entered the marriage market, the cohorts born between 1841-1845 were smaller than their counterparts born before or after. The ages used for the comparison are somewhat below the average age at first marriage (data from the census 1846 and 1856 indicate that women's mean age of marriage was 28.6 years and men's mean age at marriage was 30.8 years) but still close enough to marriageable age, and enable us to cover the 1841-1845 cohorts, captured at young adulthood.

This snapshot shows that the cohort size of the birth years 1841-1845 at ages 21-25 was in fact bigger than the size of the cohort ten years before (+6.23%). Of course, this is an indirect measurement, and it does not preclude higher mortality for the 1841-1845 cohorts overall, nor does it inform us about municipality-level deviations from this average trend. But it does show that near marriage age, measured at the country level these cohorts overall were not smaller than the birth cohorts of 1821-1825 or 1831-1835. To our knowledge there were no events that caused high mortality cues in the birth cohorts 1821-1825 and 1831-1835.

Admittedly, we do not have information on the size of the cohorts born 1836-1840, the immediate marriage candidates for the female cohorts of 1841-1845 affected by high mortality, at ages 21-25. However, the size of the 1836-1840 male cohorts was  $N=211\ 318$  in 1856, at ages 16-20 and  $N=187\ 331$  in 1866, at ages 26-30. At ages 21-25, the male cohort born 1836-1840 consisted of approximately 199 325 individuals (not accounting for the rise of mortality rates across ages 16-30). The cohort of men who formed the prime marriage candidates for women who had been affected by the mortality crisis was therefore approximately the same in size as the preceding cohort of men (see Table 5). Therefore, there are no indications for reduced competition for marriage partners slightly older than themselves among females born in the famine years (in fact, the shift in sex ratios suggests that there might have been more women relative to slightly older men than before for the 1841-1845 female cohort, so increasing competition).

Theoretically, it seems logical that for men, lower marriage ages might have resulted from the ability to choose from a larger female cohort, especially since the 1855-1859 cohorts were considerably larger than the 1841-1845 cohorts. However, in fact, the 1846-1850 born female cohorts were not larger than the 1841-1845 cohorts: at ages 16-20, in 1866, their  $N$  was 204 682; in 1880 their  $N$  was 176 299. Under the same rough calculation as for men, attributing 5/14 of the mortality occurring between ages 16-30 to the 5 years that turned the 16-20 year old women into 21-25 year old women (again not accounting for progressiveness of mortality rates), the female cohort born between 1855-1859 would have consisted of about 194 545 individuals aged 21-25 years. At that size, this cohort was considerably smaller than the 1841-1845 cohort. Given the fact that fewer young women were available to them to choose from as marriage partners, therefore, men exposed to mortality crisis during their early childhood neither had an easier time at the marriage market.

The fact that the cohorts immediately following the mortality crisis cohorts were not bigger, might, we suspect be due to the economic conditions around the time of the crop failure crisis: in demography, it has been demonstrated that periods of economic crisis tend to lead to postponement of fertility.

The cohorts born 1855-1859, however, were larger than the 1841-1845 cohorts. This can be explained by a rise in the proportion of the population married. From 1856 the index of the proportion of the population married ( $I_m$ ) started to increase. It rose from .366 in the 1856 census to .435 in the 1880 census. This trend led to an increase in marital fertility, which in turn led to higher fertility and therefore population growth (see Lesthaeghe, 2015).
